# Supplementary material for: Stroma-derived but not tumor ADAMTS1 is a main driver of tumor growth and metastasis
Source: PubMed Central journal article supplement (PMC5085172; doi:10.18632/oncotarget.8922), 2016-04-22
Supplement: oncotarget-07-34507-s001.pdf [file oncotarget-07-34507-s001.pdf]

## Stroma-derived but not tumor ADAMTS1 is a main driver of tumor growth and metastasis

### SUPPLEMENTARY FIGURES

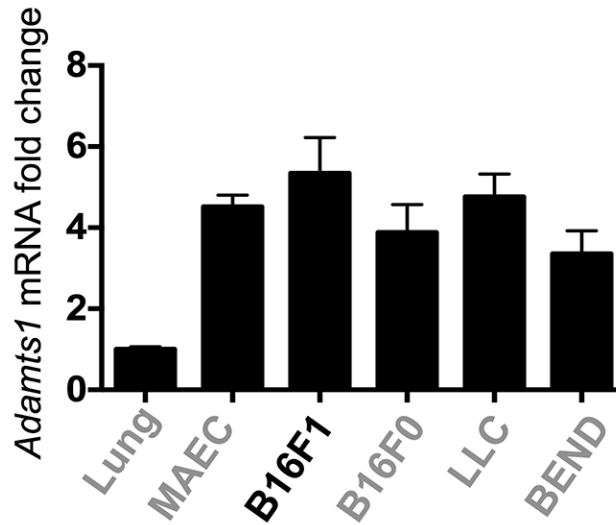

Supplementary Figure S1: Graph representing Adamts1 gene expression in different tumor and primary mouse cell lines in culture, compared with mouse lung. Bars show mean values  $\pm$  SEM.

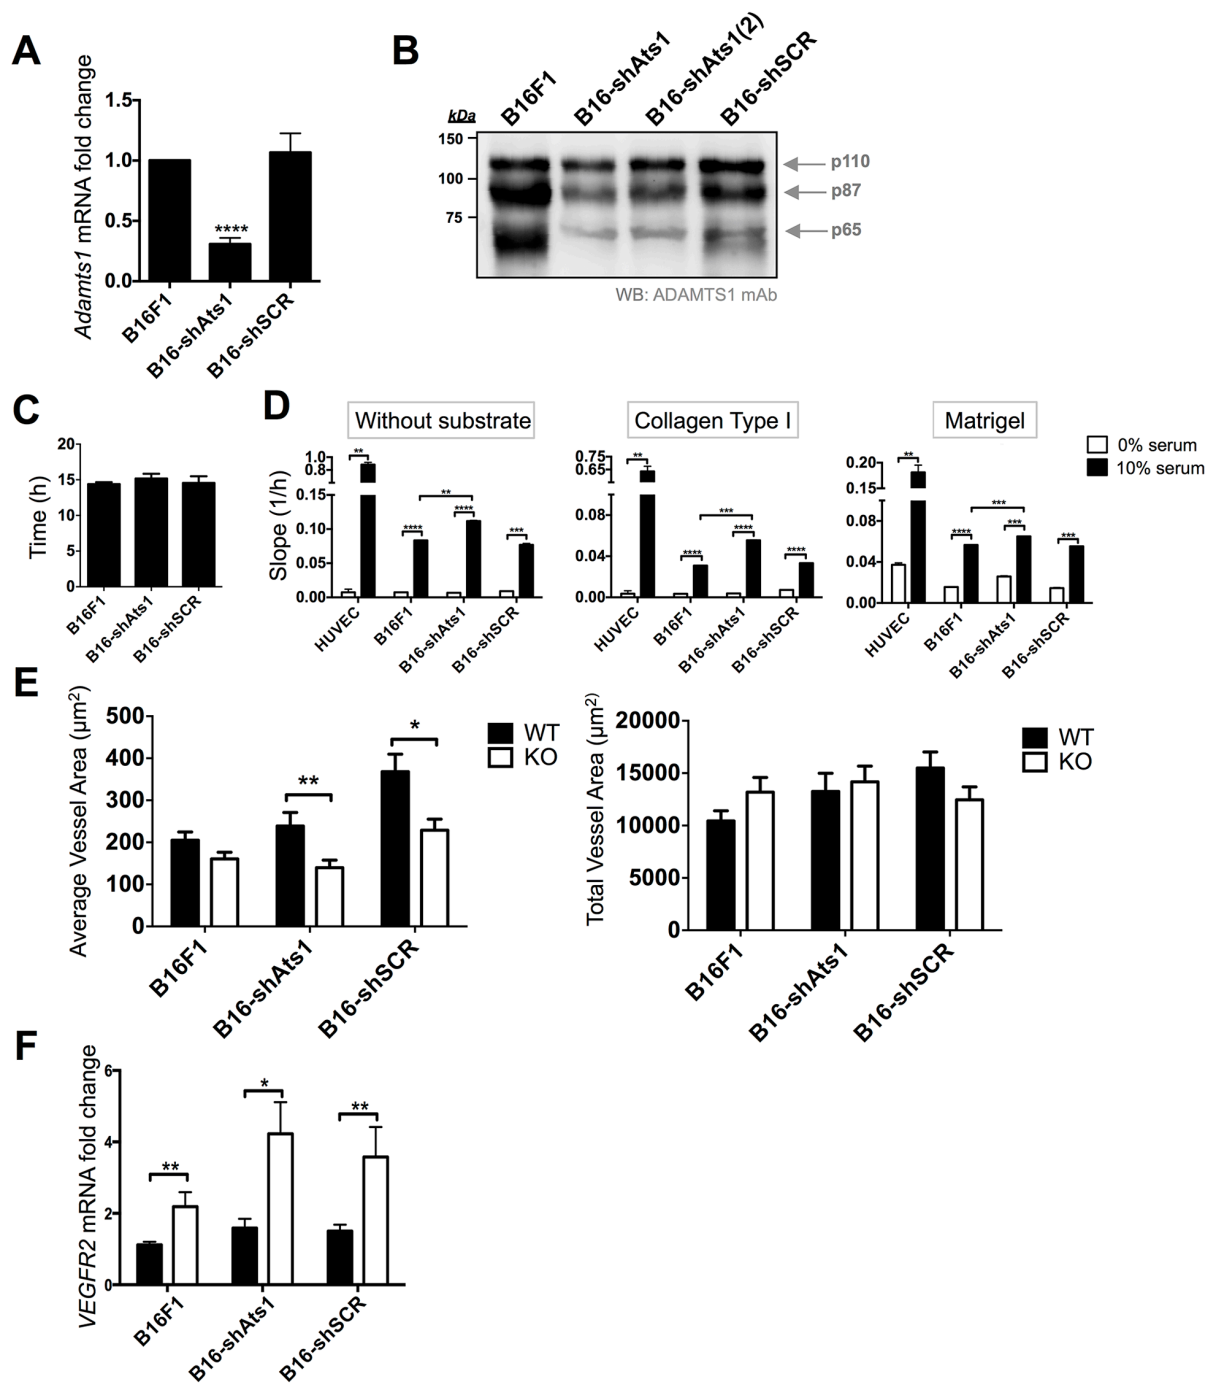

**Supplementary Figure S2: Studies with control and modified B16F1 cells, and additional characterization of vasculature of tumors derived from control and modified B16F1 cells in WT and AT51-KO mice.** A. Graph representing Adamts1 gene expression in control B16F1 cells, shADAMTS1 targeted cells (B16-shAts1) and the non-target shRNA control (B16-shSCR). Bars show mean values  $\pm$  SEM. B. Protein analysis by Western-Blot of ADAMTS1 in control and modified B16F1 cells, as mentioned in panel B. Two different shADAMTS1-inhibited cell populations are showed. C. Graph representing doubling time of control and modified B16F1 cells, showing that the downregulation of ADAMTS1 does not provoke any effect. D. Graphs representing the migration rate in different substrates, determined in an XCelligence platform, of control and modified B16F1 cells, also including HUVEC as a positive control for the assay. E. Graphs representing results from the morphometric analyses of vasculature (Metamorph 7 software) of tumors from different groups as indicated. These analyses include average vessel area ( $\mu\text{m}^2$ ), and total vessel area ( $\mu\text{m}^2$ ). F. Graphs representing gene expression evaluation of vascular related VEGFR2 in tumors from different groups as indicated. Bars show mean values  $\pm$  SEM. (\*,  $p < 0.05$ ; \*\*,  $p < 0.01$ ; \*\*\*,  $p < 0.001$ ; \*\*\*\*,  $P < 0.0001$ ).

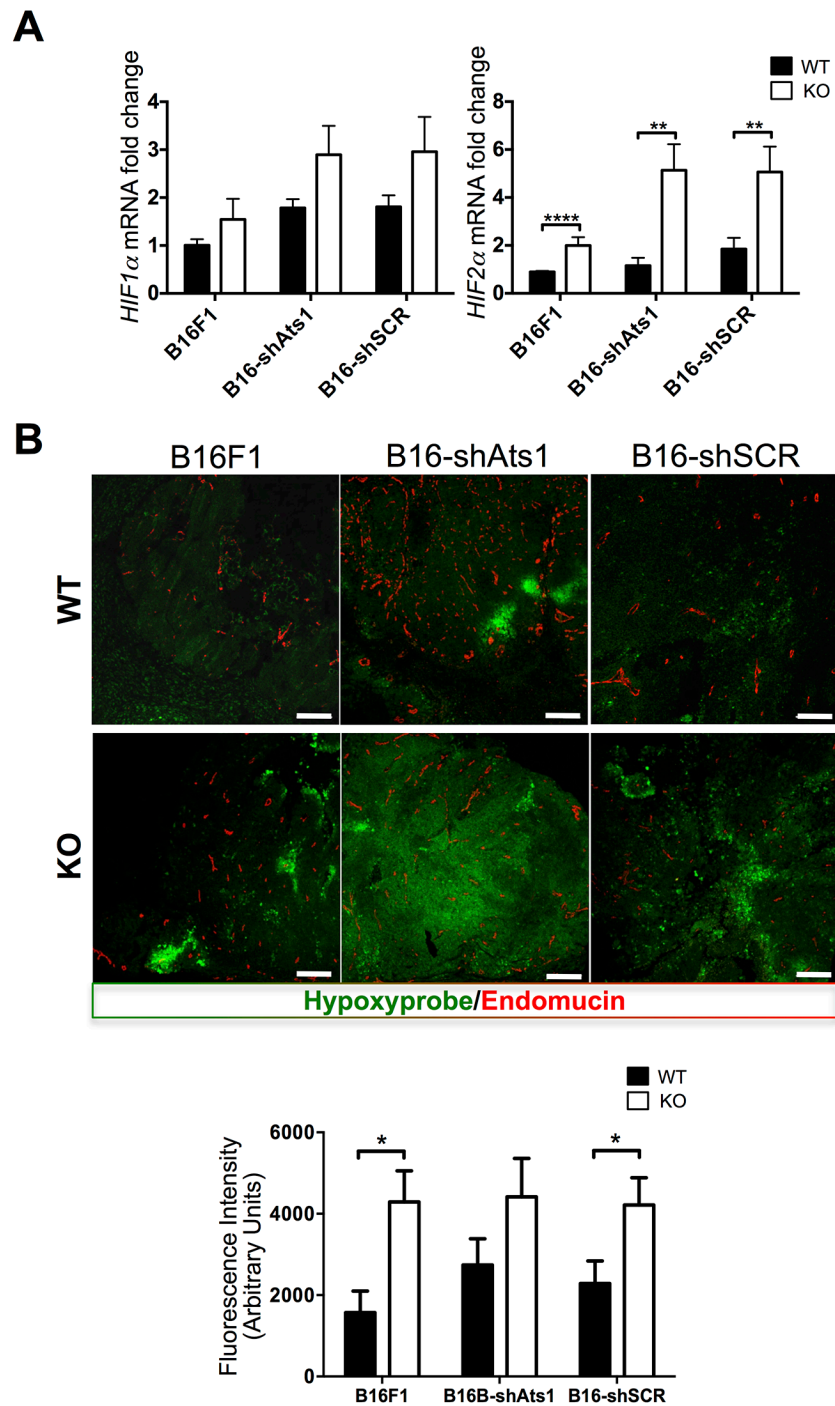

**Supplementary Figure S3: Additional characterization of hypoxia of tumors derived from control and modified B16F1 cells in WT and ATs1-KO mice.** **A.** Graphs representing gene expression evaluation of hypoxia-related genes (HIF1 $\alpha$  and HIF2 $\alpha$ ) in tumors from different groups as indicated. Bars show mean values  $\pm$  SEM. (\*\*,  $p < 0.01$ ; \*\*\*\*,  $P < 0.0001$ ). **B.** Representative images from confocal microscopy showing immunolabelling of Hypoxyprobe (green) and Endomucin (red) in tumors generated with control and modified B16F1 cells in WT and ATs1-KO mice. Graph in the right side represents a quantification of fluorescence intensity in tumor sections from different groups as indicated. (\*,  $p < 0.05$ ; \*\*,  $p < 0.01$ ; \*\*\*\*,  $p < 0.0001$ ).

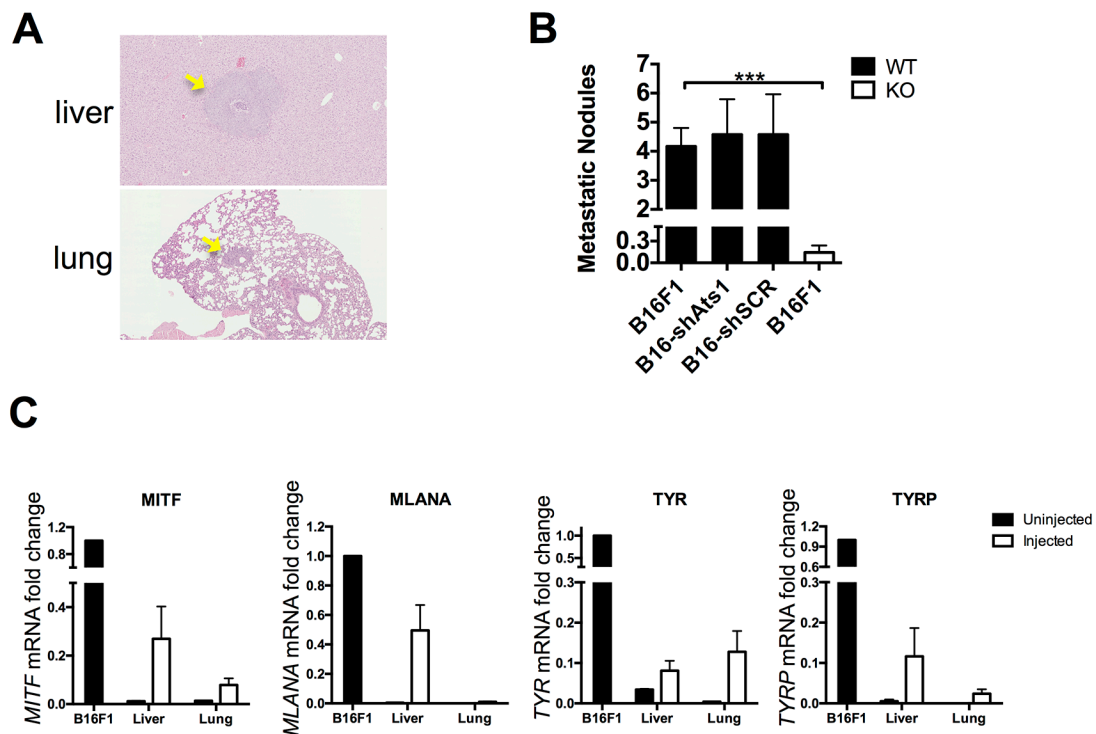

**Supplementary Figure S4: Evaluation of B16F1-derived metastasis in liver and lung.** Control and B16F1-injected mice were sacrificed and their organs were properly dissected and processed for RNA extraction and paraffin sections. **A.** Representative brightlight microscopic images of metastatic nodules found in the liver and lung of B16F1-injected mice. To visualize these nodules, paraffin sections were stained with Hematoxylin-eosin. **B.** Graph representing the quantification of visible metastatic nodules in whole liver sections of WT and ATs1-KO mice injected with the indicated cells (control and modified B16F1). Bars show mean values  $\pm$  SEM. **C.** Graphs representing gene expression analysis of melanoma markers (MITF, MLANA, TYR, TYRP) in liver and lung of control uninjected and B16F1-injected WT mice. B16F1 cells were used as a positive control.
